# Supplementary material for: A proof-of-concept study on a fully biobased and degradable polymer network based on vanillin and myrcene
Source: Royal Society of Chemistry journal article supplement (doi:10.1039/d4py00269e), 2024-01-01
Supplement: d4py00269e1.pdf [file d4py00269e1.pdf]

## A proof-of-concept study on a fully biobased and degradable polymer network based on vanillin and myrcene

Pia S. Löser,<sup>a</sup> Arthur Lamouroux<sup>b</sup>, Michael A.R. Meier,<sup>a,c</sup> and Audrey Llevot<sup>\*b</sup>

<sup>1</sup> Laboratory of Applied Chemistry, Institute of Organic Chemistry (IOC), Karlsruhe Institute of Technology (KIT), Straße am Forum 7, 76131 Karlsruhe, Germany.

<sup>2</sup> Univ. Bordeaux, CNRS, Bordeaux INP, LCPO, UMR 5629, F-33600, Pessac, France

<sup>3</sup> Laboratory of Applied Chemistry, Institute of Biological and Chemical Systems – Functional Molecular Systems (IBCS-FMS), Karlsruhe Institute of Technology (KIT), Hermann-von-Helmholtz-Platz 1, 76344 Eggenstein-Leopoldshafen, Germany.

Corresponding author. E-mail address: [audrey.llevot@enscbp.fr](mailto:audrey.llevot@enscbp.fr)

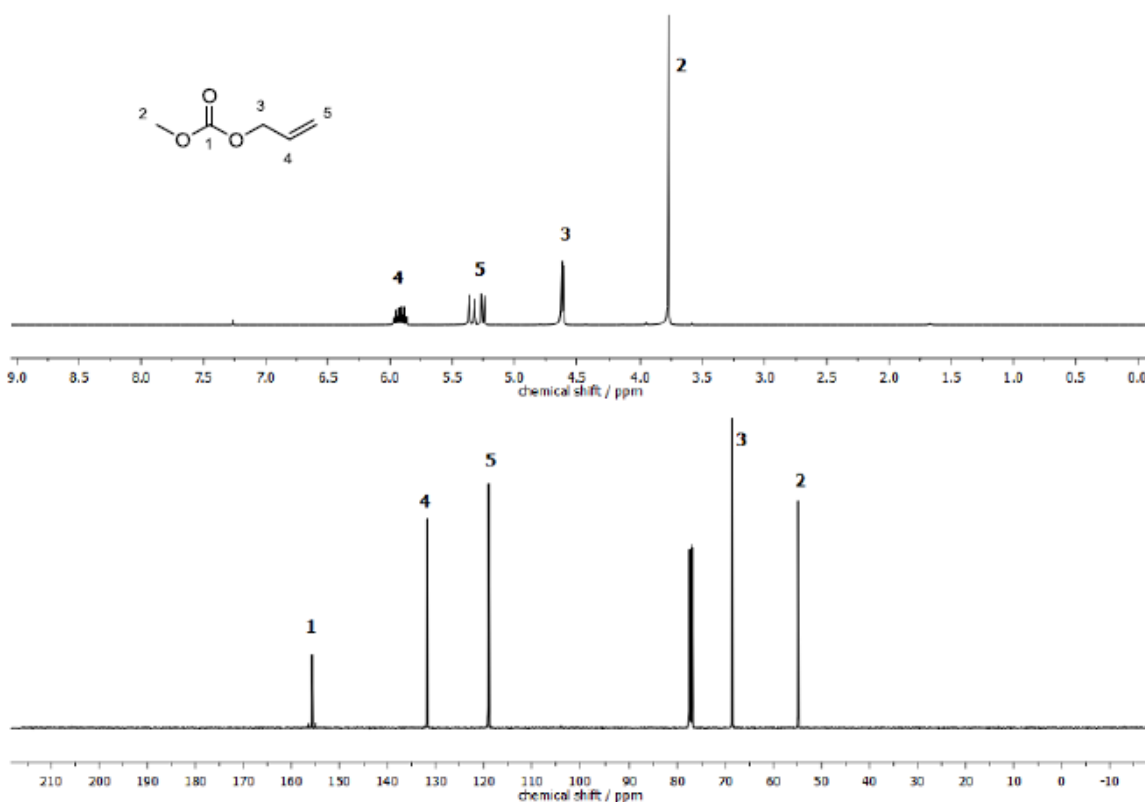

**Figure S1.** Top: <sup>1</sup>H-NMR spectrum of allyl methyl carbonate; bottom: <sup>13</sup>C NMR spectrum of allyl methyl carbonate in CDCl<sub>3</sub>.

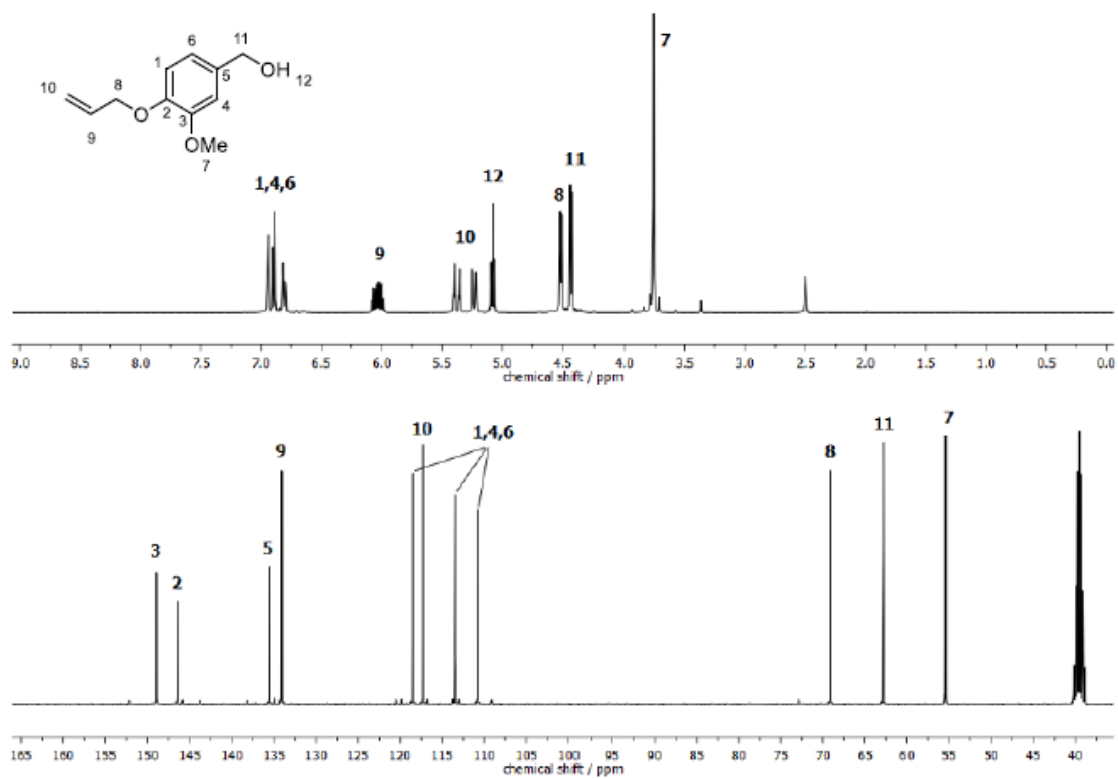

**Figure S2.** Top:  $^1\text{H-NMR}$  spectrum of AVA; bottom:  $^{13}\text{C NMR}$  spectrum of AVA in  $\text{DMSO-d}_6$ .

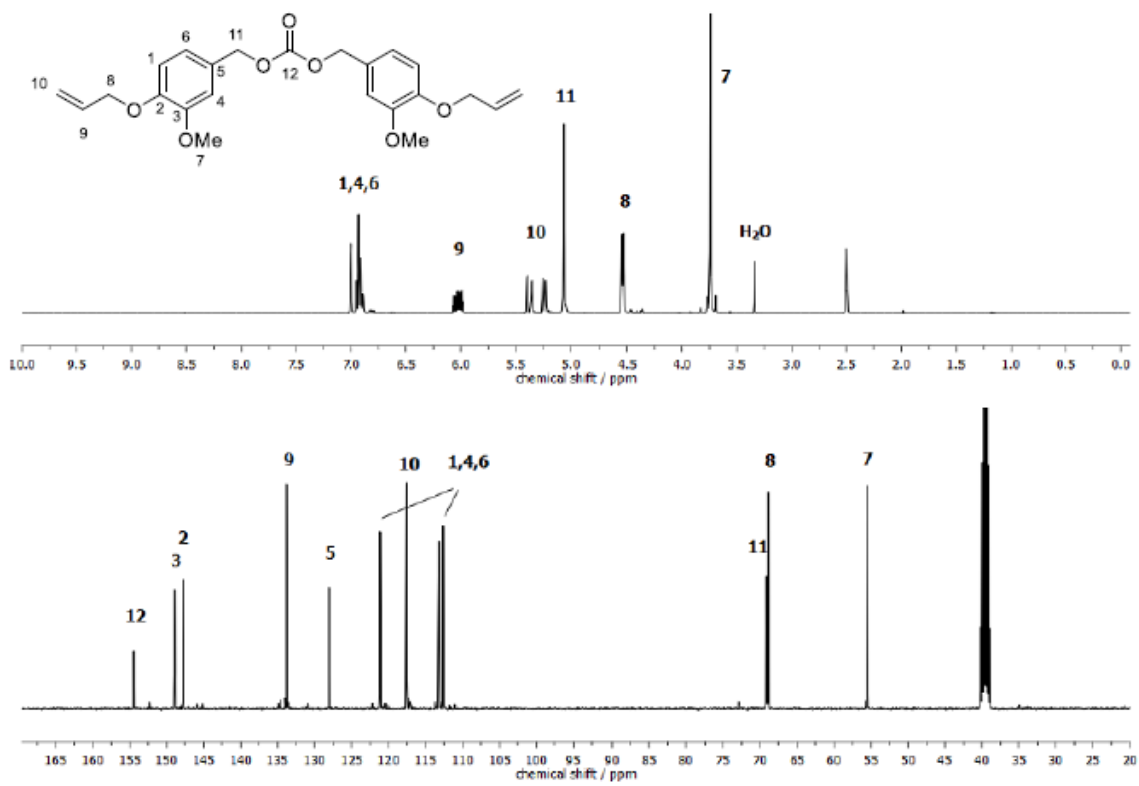

**Figure S3.** Top:  $^1\text{H-NMR}$  spectrum of AVACarb; bottom:  $^{13}\text{C NMR}$  spectrum of AVACarb in  $\text{DMSO-d}_6$ .

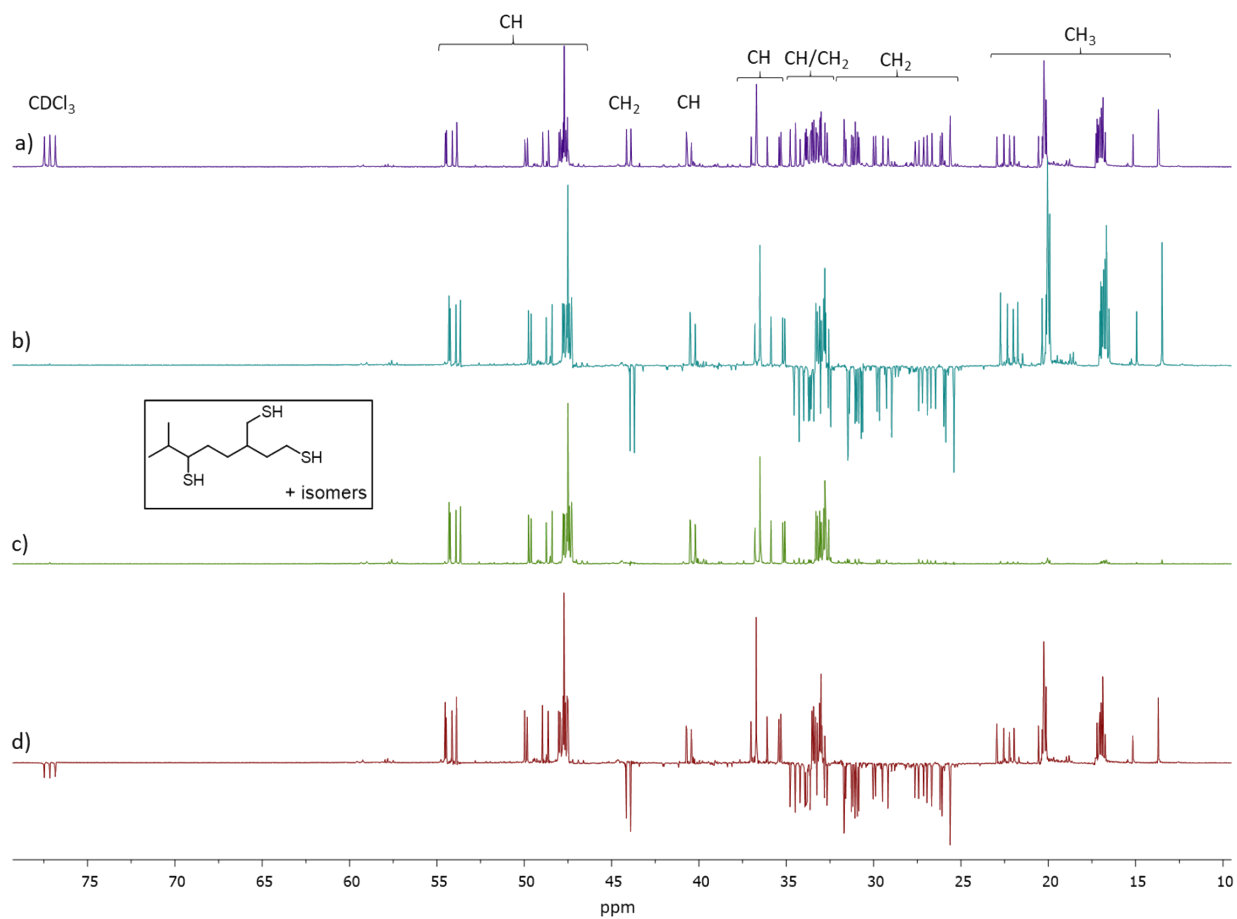

**Figure S4.** NMR spectra of myrcene trithiol in CDCl<sub>3</sub>: (a) <sup>13</sup>C NMR, (b) Jmod, (c) DEPT 90, (d) DEPT 135

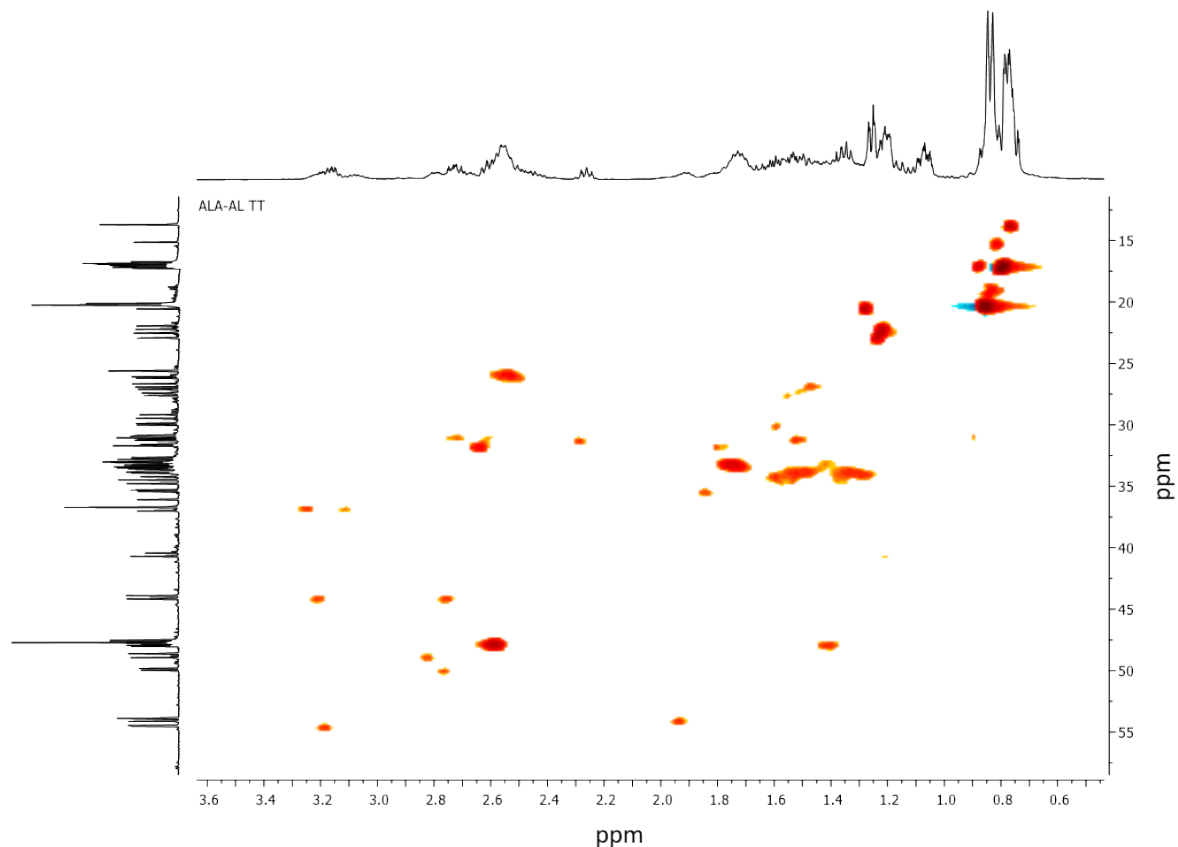

**Figure S5.** HSQC analysis of myrcene trithiol in  $\text{CDCl}_3$

### Synthesis of the model thiol-ene adduct

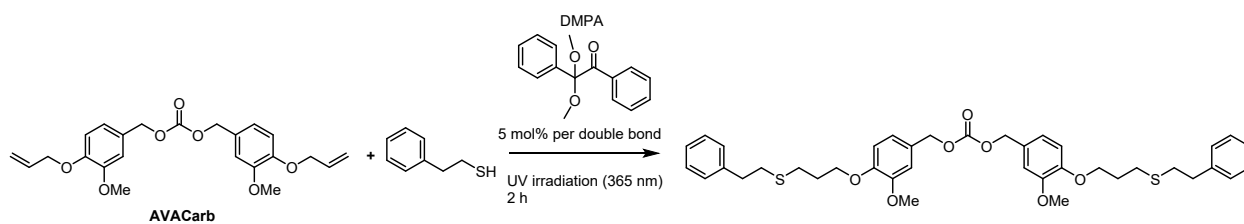

**Scheme S1.** Synthesis of a model thiol-ene adduct from **AVACarb**

In a reactor vessel, **AVACarb** (10 mg, 0.024 mmol) was mixed with 2-phenylethanethiol (6.5  $\mu\text{L}$ , 0.048 mmol) in a double bond:thiol ratio of 1:1. Then, DMPA (5 mol% per double bond) was added. To ensure homogeneity, degassed chloroform (0.1 mL) was added into the reactor vessel. The resulting solution was placed into the UV oven under UV irradiation (365 nm, 50% power) for 2 hours.

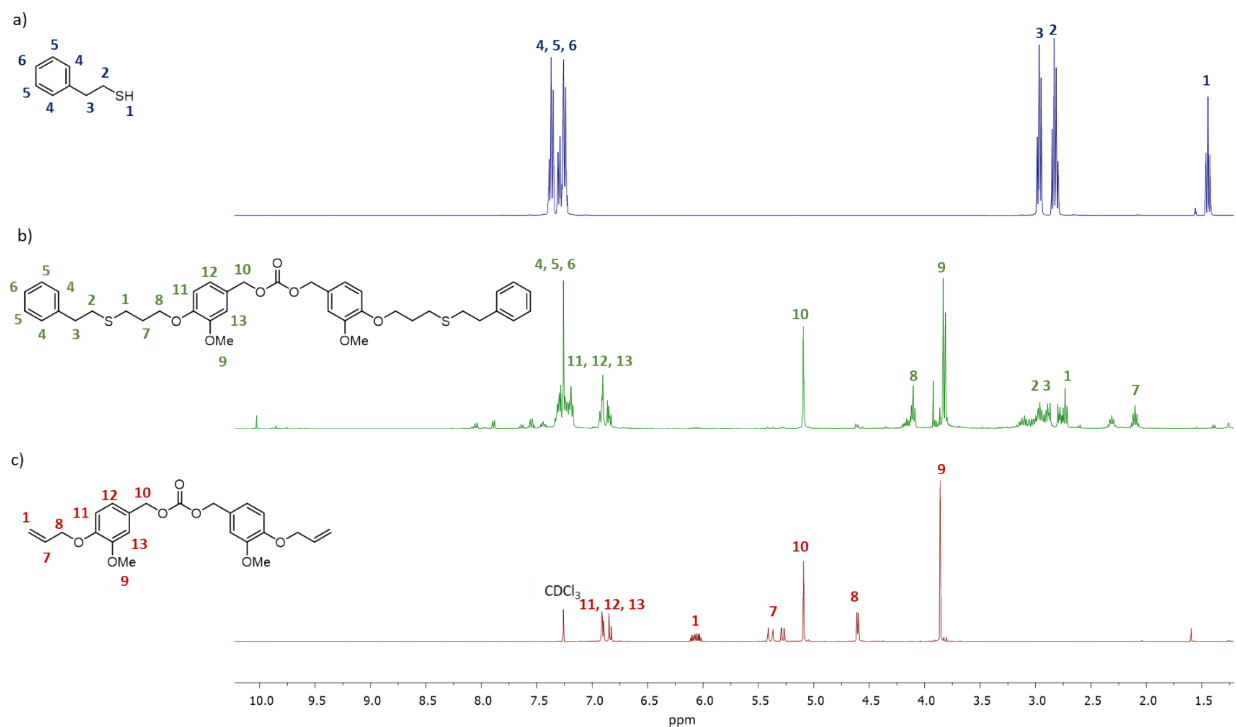

**Figure S6.**  $^1\text{H}$  NMR spectra of 2-phenylethanethiol (a), the crude reaction mixture after synthesis of the model thiol-ene adduct (b) and AVACarb (c).

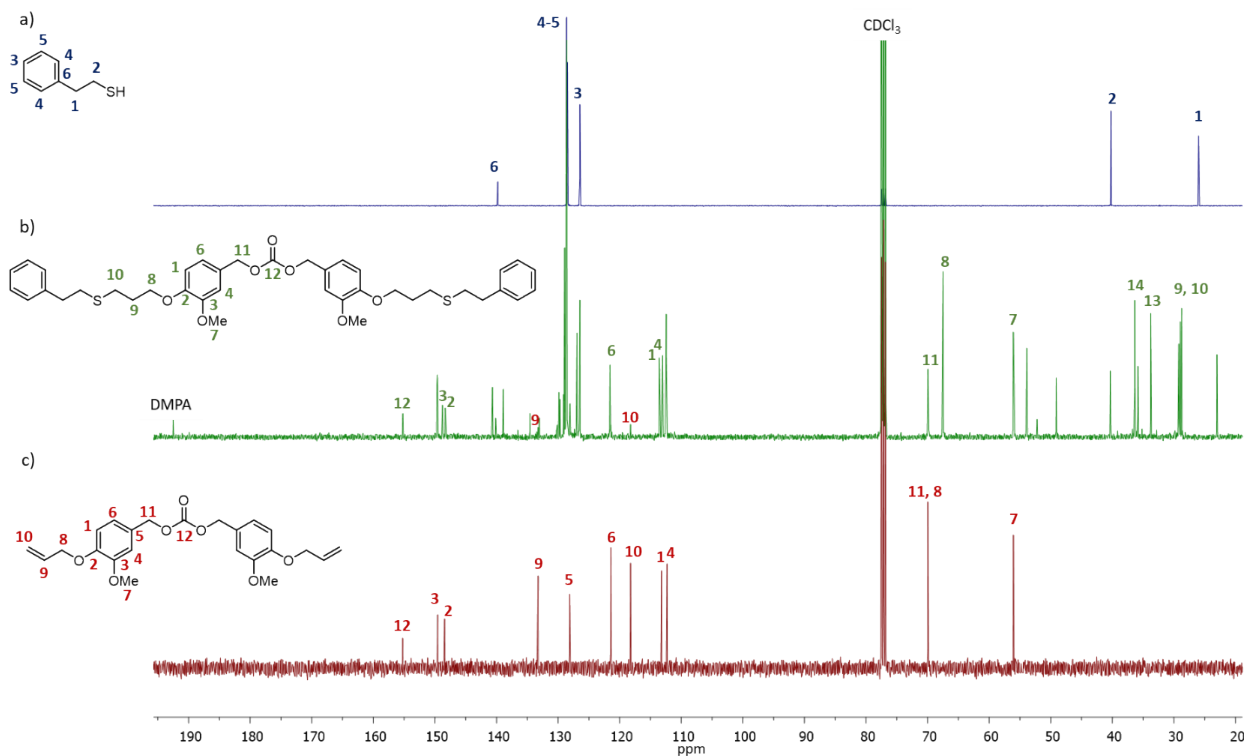

**Figure S7.**  $^{13}\text{C}$  NMR spectra of 2-phenylethanethiol (a), the crude reaction mixture after synthesis of the model thiol-ene adduct (b) and AVACarb (c).

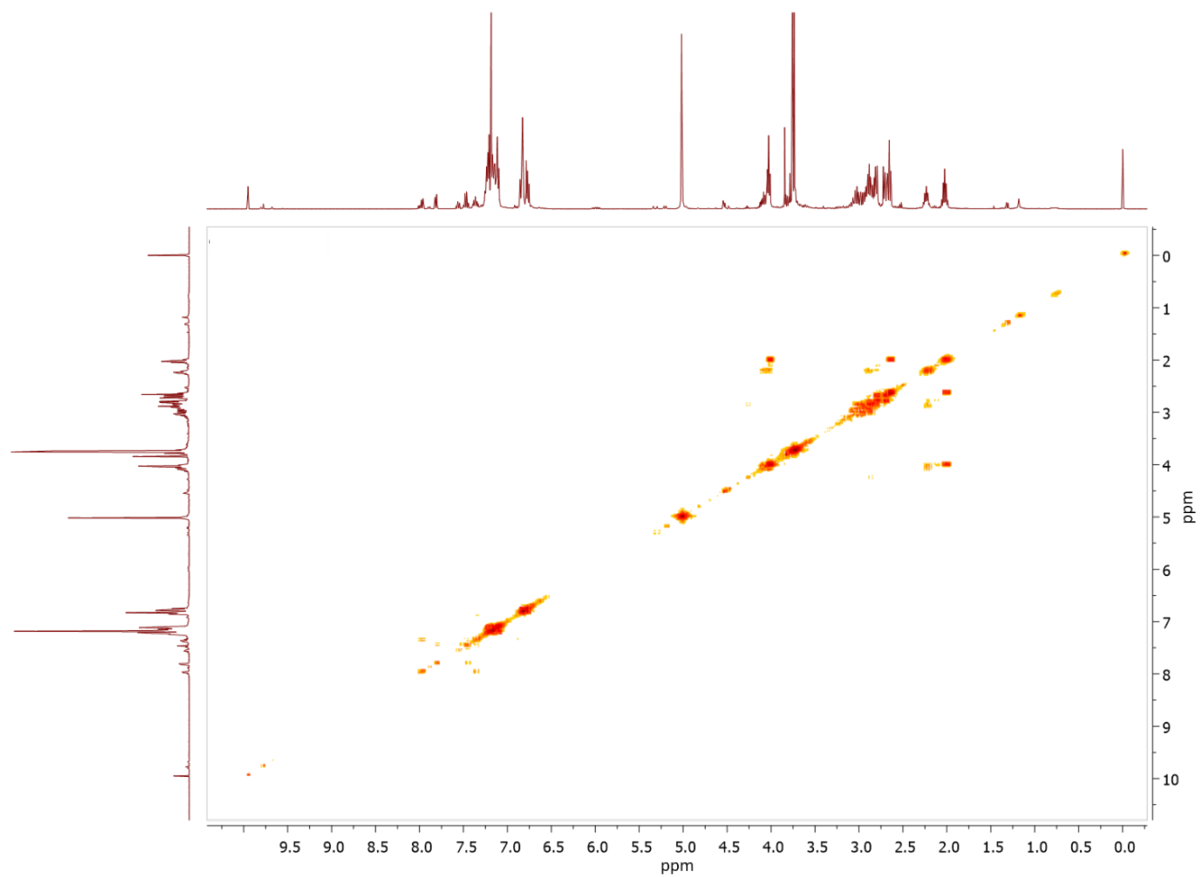

**Figure S8.** COSY analysis the crude reaction mixture after synthesis of the model thiol-ene adduct in CDCl<sub>3</sub>.

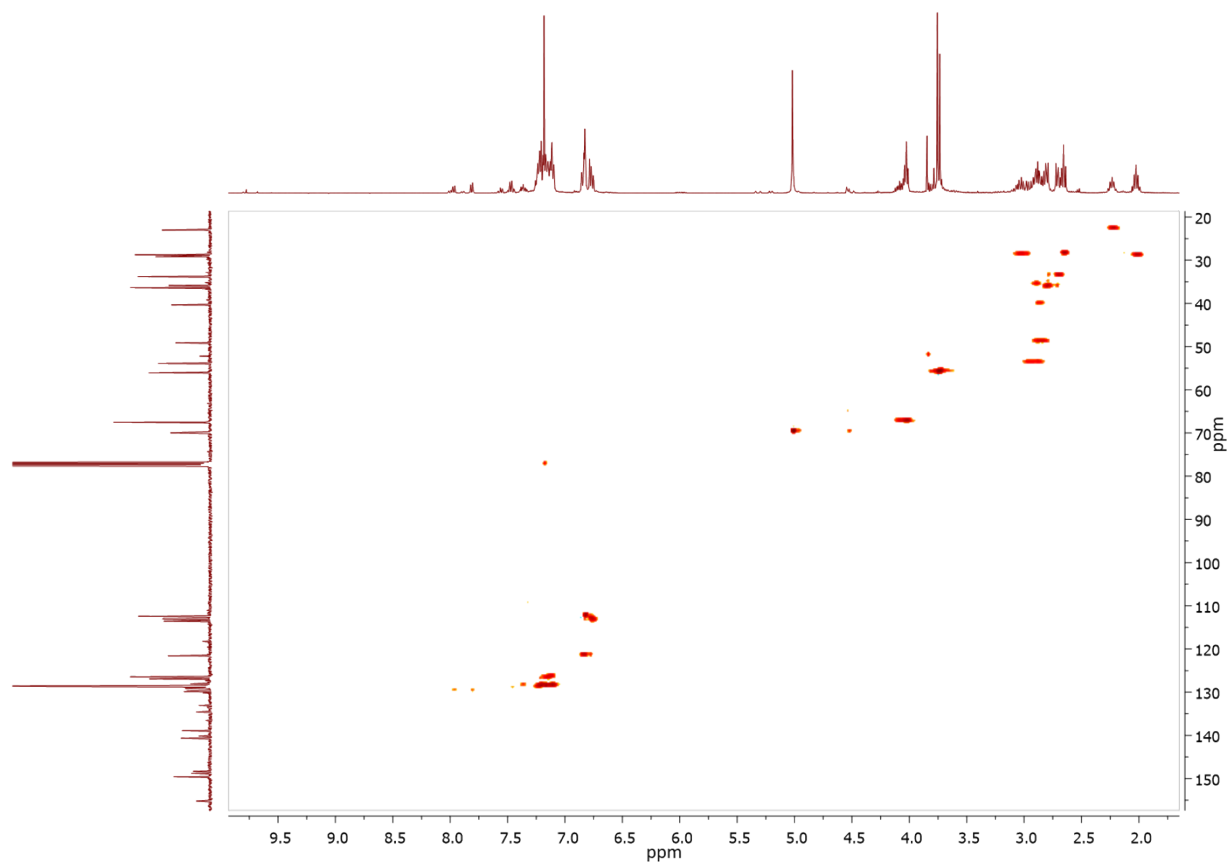

**Figure S9.** HSQC analysis the crude reaction mixture after synthesis of the model thiol-ene adduct in CDCl<sub>3</sub>.

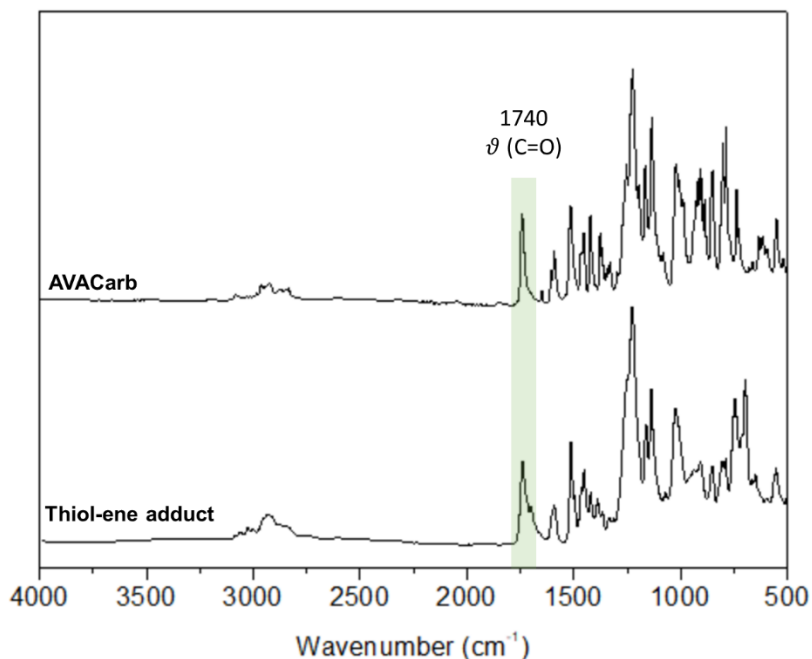

**Figure S10.** FTIR spectra of AVACarb (top) and the crude reaction mixture after synthesis of the model thiol-ene adduct.

**Method:** LC-ESI/MS analysis

LC-ESI/MS analysis were performed on a Linear Ion Trap mass spectrometer (LTQ, Thermo Fisher Scientific) linked to Vanquish liquid chromatography system (Thermo Fisher Scientific) consisted of pump VF-P20-A, a UV-VIS detector (VF-V40-4 set at 280 nm), a column oven (VH-C10-A) and an autosampler (VF-A10-A). Identification was based on full-scan MS covering  $m/z$  150–2000 and in MS<sub>n</sub> mode. Raw data were analysed by Xcalibur software (Thermo Fisher Scientific). HPLC-MS<sub>n</sub> analysis was performed in positive electrospray ionisation (ESI) mode with a LC column Nucleodur 100-C5 C18 ec (250 X 4 mm, 5 $\mu$ m) from Macherey-Nagel maintained at 25°C. The mobile phase consisted of acetonitrile with a flow rate of 0,7mL/min. The sample was dissolved in a mixture CHCl<sub>3</sub>/ACN (1/10, v/v). Injection volume was 10  $\mu$ L. Electrospray source parameters were as follows: heater temperature 45°C, capillary voltage +49 V, tube lens voltage +120V, capillary temperature 275°C, sheath and auxiliary gas flow (N<sub>2</sub>) 50 and 10, sweep gas 0, spray voltage 5 kV.



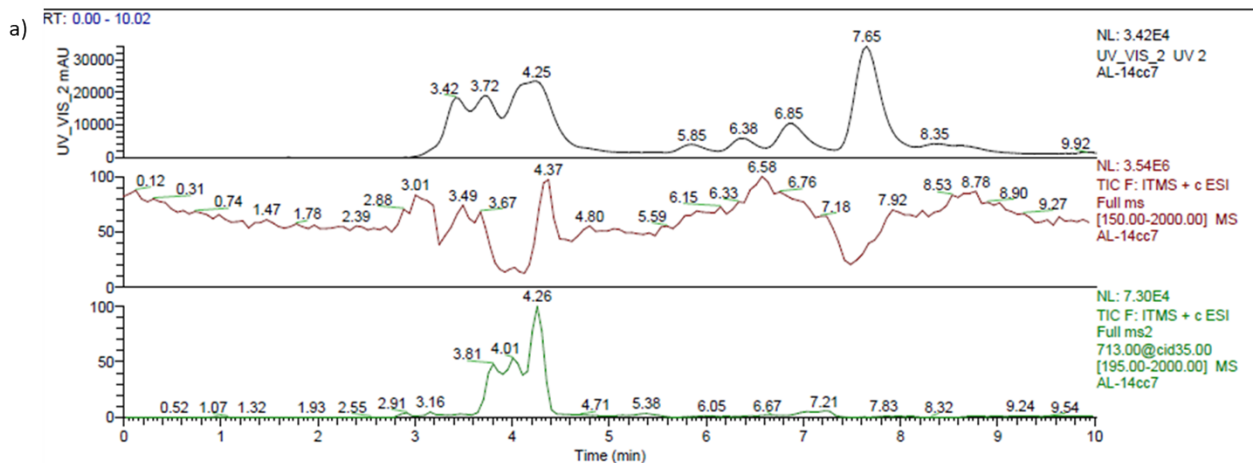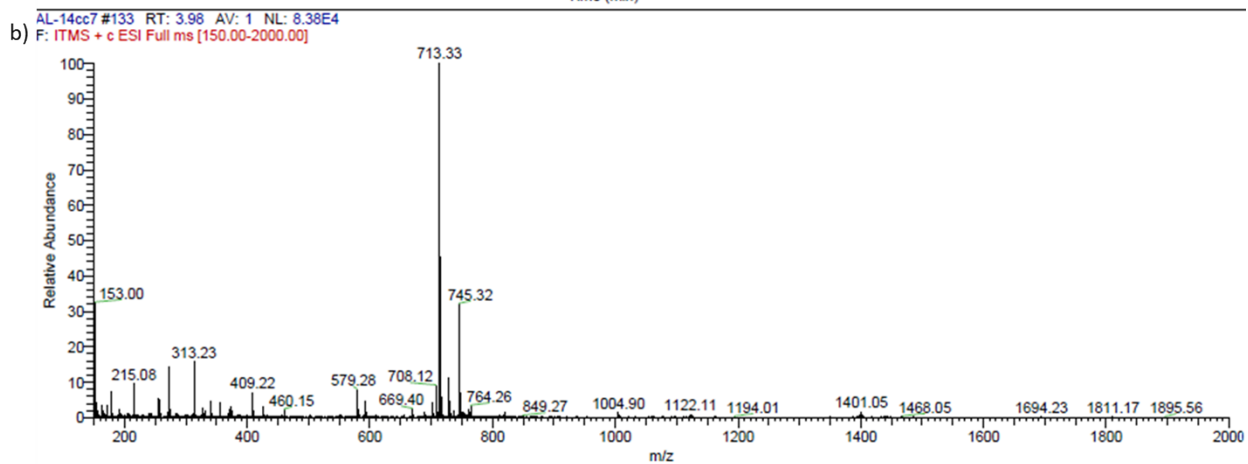

**Figure S11.** LC chromatogram of the crude reaction mixture after synthesis of the model thiol-ene adduct (a), ESI-MS spectrum of the peak at around 4 min of retention time revealing the mass of the expected product  $[M+Na]^+$ .

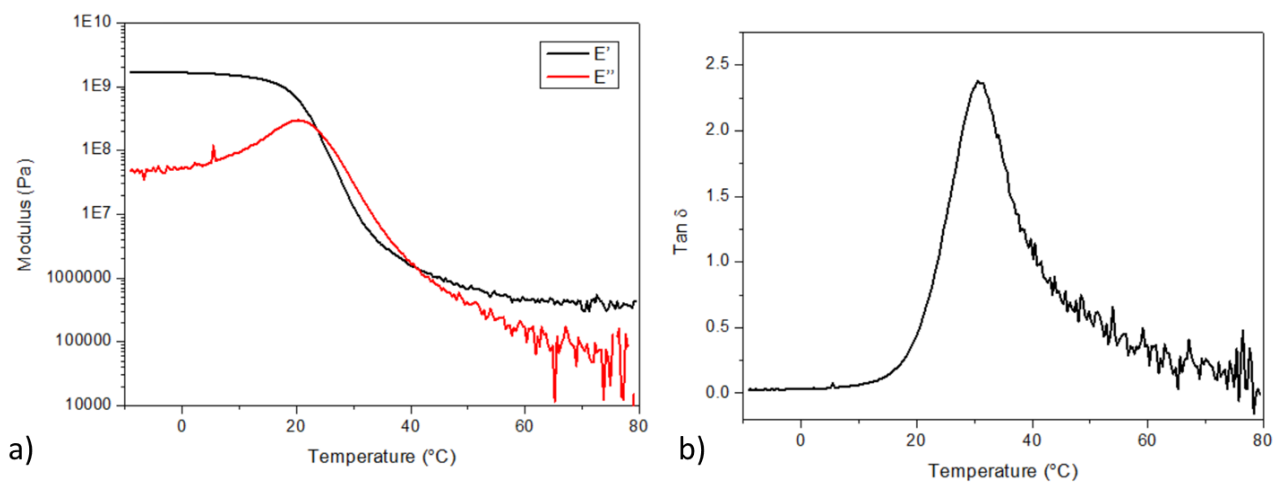

**Figure S12.** DMA analysis of the polymer network: evolution of the storage and loss moduli with the temperature (a) and tan  $\delta$  (b).

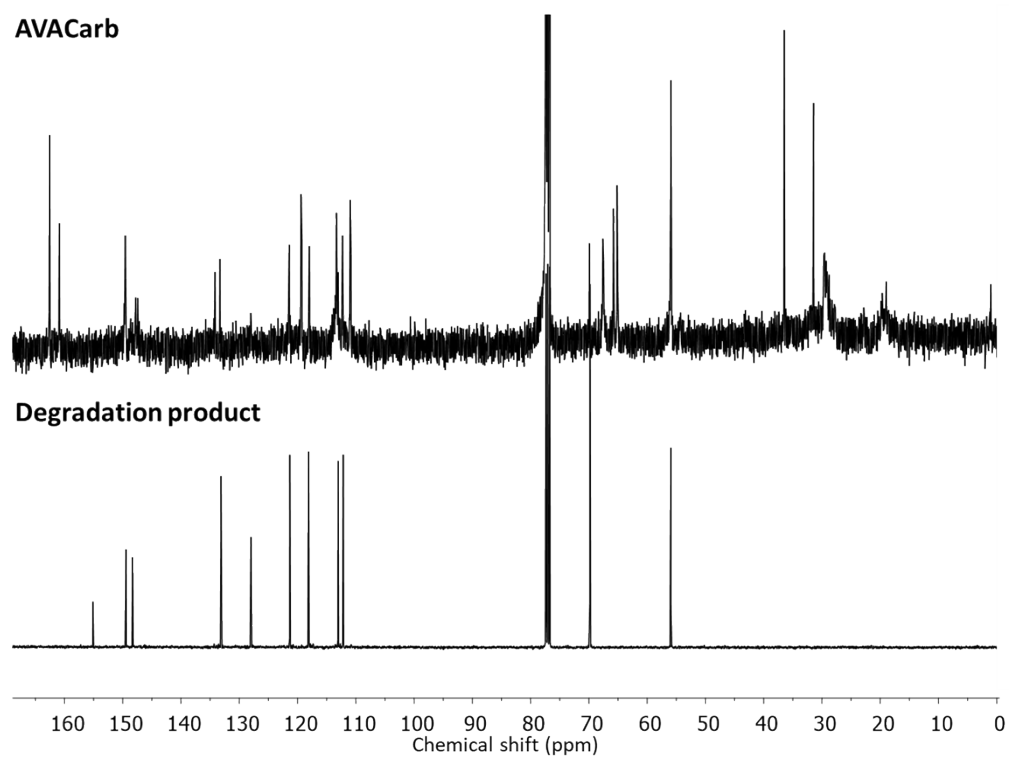

**Figure S13.**  $^{13}\text{C}$  NMR spectra of AVACarb (top) and polymer network degradation product (bottom) in  $\text{CDCl}_3$ .

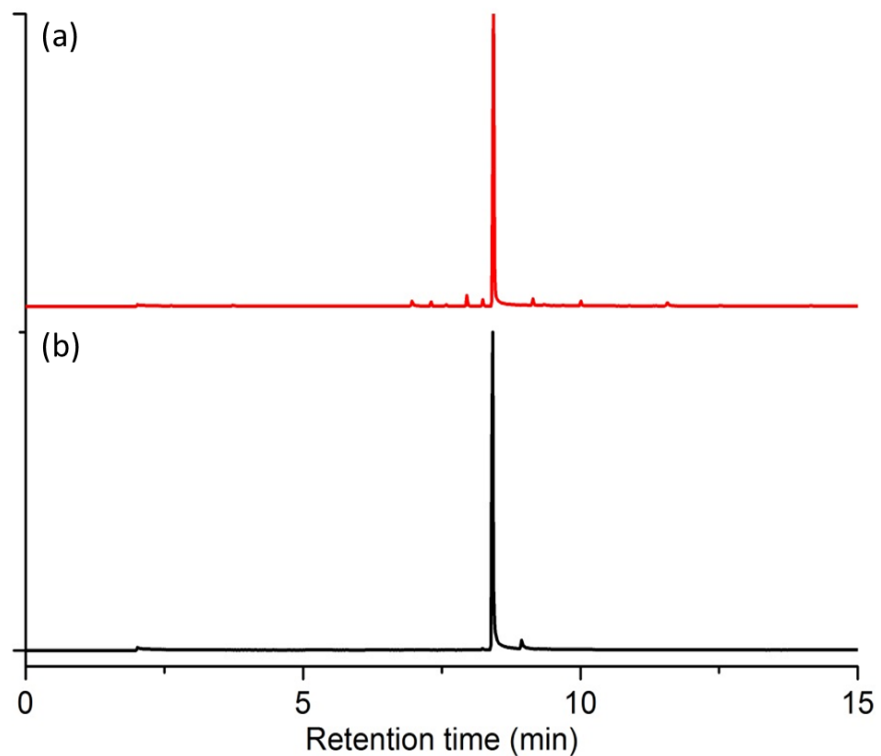

**Figure S14.** GC-MS chromatogram of (a) allylated vanillyl alcohol (**AVA**) and (b) degradation product of **AVACarb**.

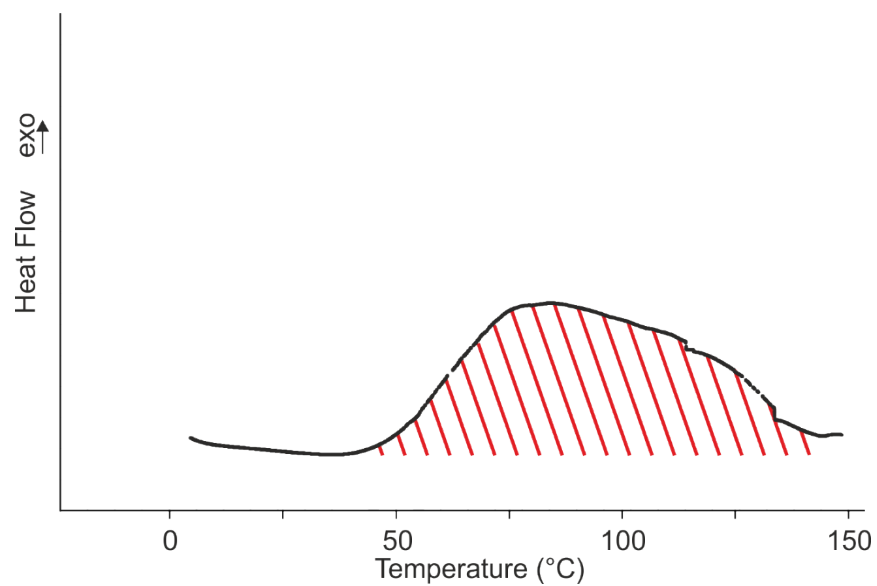

**Figure S15.** DSC thermogram of the repolymerization of the polyols in the presence of HMDI and catalyst showing the exotherm of the repolymerization into polyurethane (1<sup>st</sup> heating).

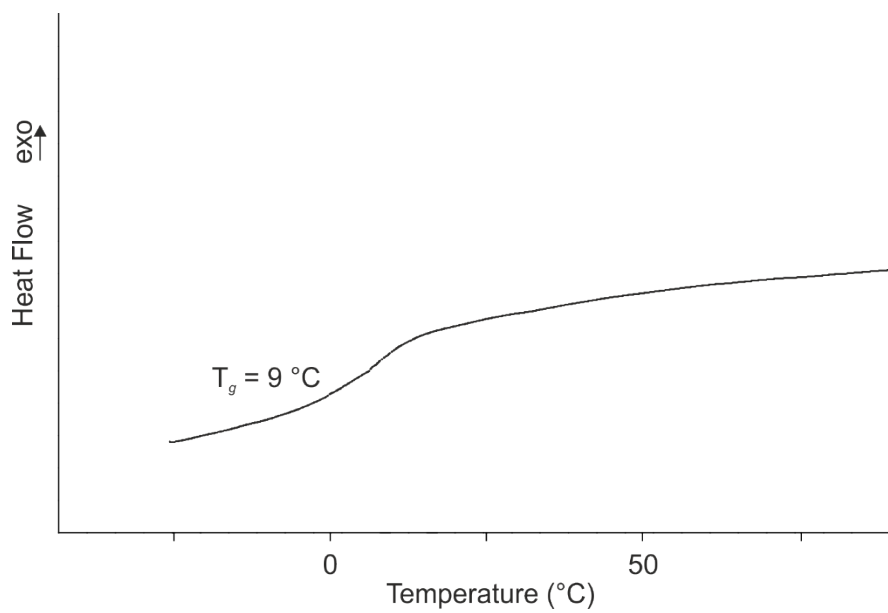

**Figure S16.** DSC thermogram of the repolymerization of the polyols in the presence of HMDI showing the glass transition (9 °C) of the resulting polyurethane (1<sup>st</sup> cooling).

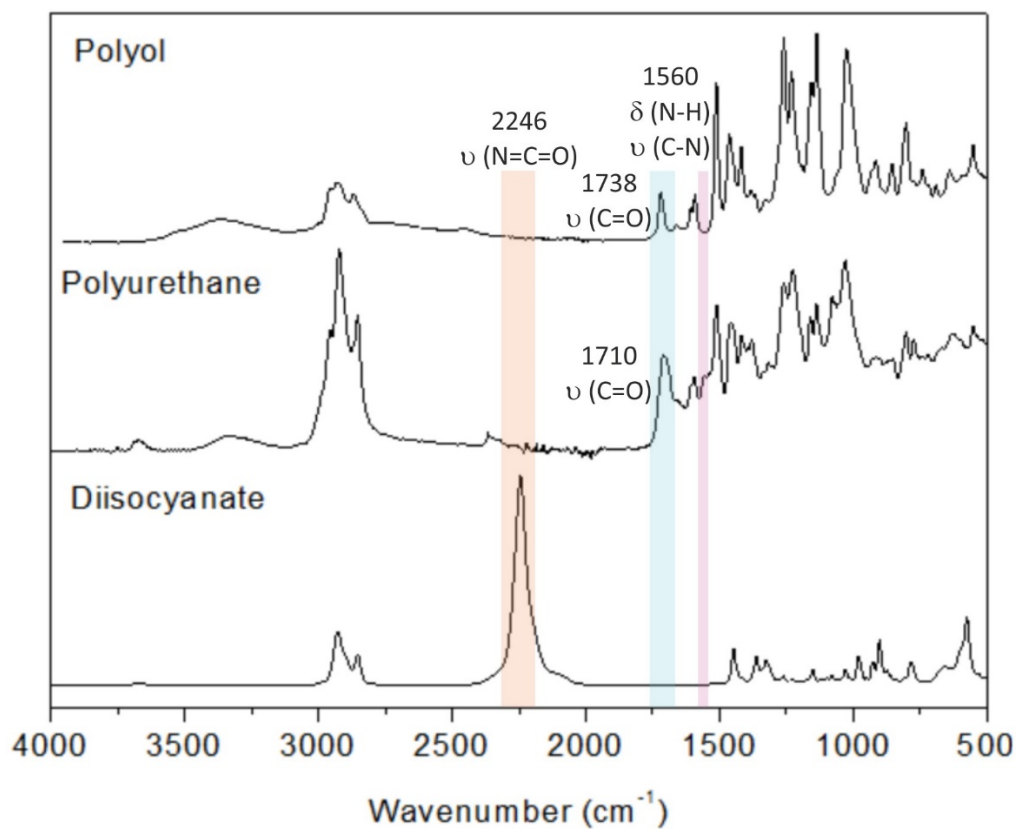

**Figure S17.** FTIR spectra of polyols (top), HMDI (bottom) and the resulting polyurethane (middle).

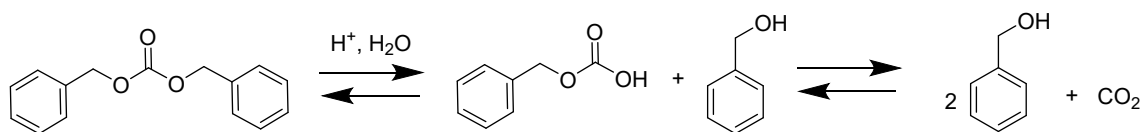

**Scheme S2.** Formation of carbonic acid benzylester from dibenzyl carbonate under acidic conditions.<sup>1, 2</sup>

**Table S1.** Examples of biobased commercially available polyols including OH content<sup>3</sup>

| Biobased molecule | OH content (mg KOH/g) | Application | Producer        | Product name |
|-------------------|-----------------------|-------------|-----------------|--------------|
| Rapeseed oil      | 56-120                | Flexible PU | Stahl           | Recal Bio    |
| Castor oil        | 102 -168              | Flexible PU | Eagle Chemicals | T series     |
| Soybean oil       | 70-110                | Flexible PU | Cargill         | BiOH         |
| Soybean oil       | 145 - 460             | All         | BASF            | Sorvemol     |
| Rapeseed oil      | 360-410               | Rigid PU    | Polylab         | Biopolyol    |

## References

1. C. M. Comisar, S. E. Hunter, A. Walton and P. E. Savage, *Industrial & Engineering Chemistry Research*, 2008, **47**, 577-584.
2. J. Østergaard and C. Larsen, *Molecules*, 2007, **12**, 2396-2412.
3. H. Sardon, D. Mecerreyes, A. Basterretxea, L. Avérous and C. Jehanno, *ACS Sustainable Chemistry & Engineering*, 2021, **9**, 10664-10677.
